# Supplementary material for: Racial Disparities in Incidence and Outcomes Among Patients With COVID-19
Source: PubMed Central journal article supplement (PMC7519420; doi:10.1001/jamanetworkopen.2020.21892), 2020-09-25

## Supplementary Online Content

Muñoz-Price LS, Nattinger AB, Rivera F, et al. Racial disparities in incidence and outcomes among patients with COVID-19. *JAMA Netw Open*. 2020;3(9):e2021892. doi:10.1001/jamanetworkopen.2020.21892

**eFigure 1.** Flowchart Depicting Excluded Patients

**eFigure 2.** Proportion of COVID-19 Results by Racial Group

This supplementary material has been provided by the authors to give readers additional information about their work.

**eFigure 1. Flowchart Depicting Excluded Patients**

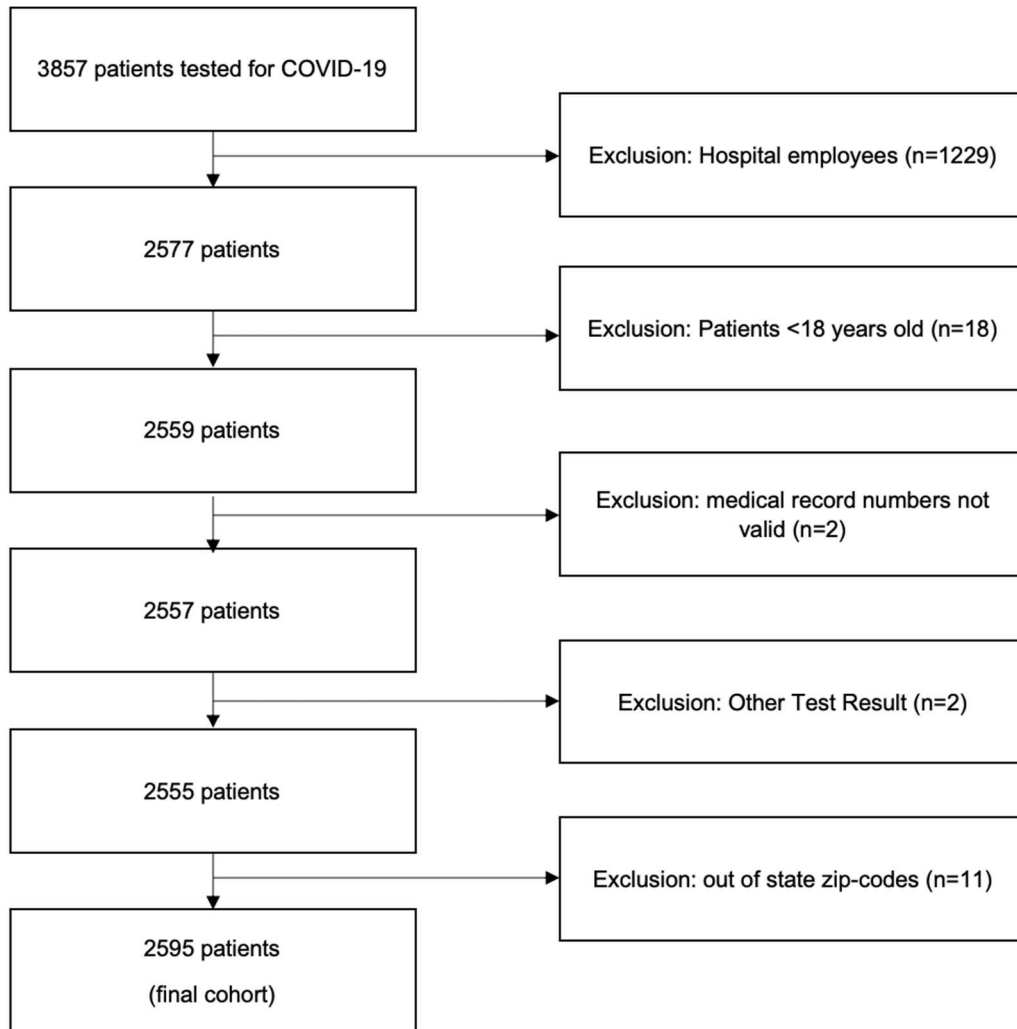

**eFigure 2. Proportion of COVID-19 Results by Racial Group**

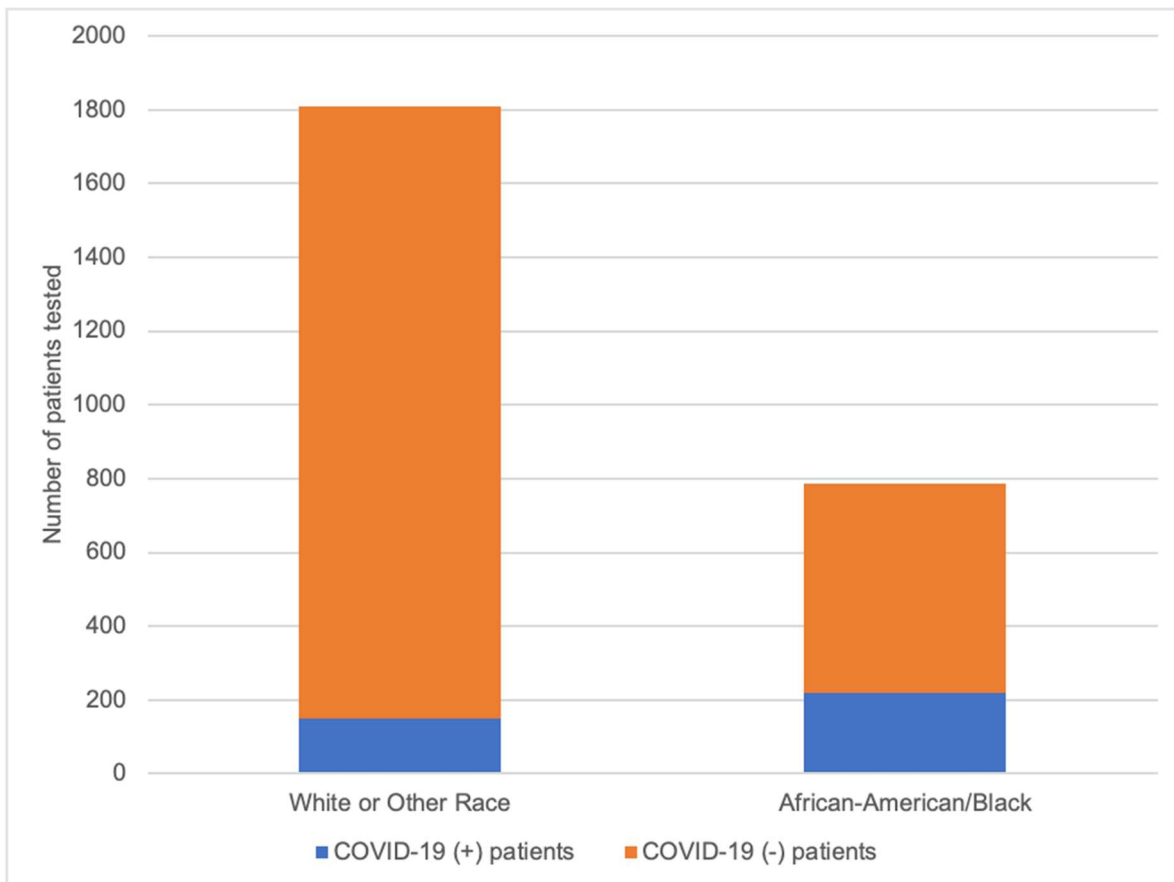

Supplement: jamanetwopen-e2021892-s001.pdf [file jamanetwopen-e2021892-s001.pdf]
